# Supplementary material
Source: PubMed Central journal article supplement (PMC4042765)
Supplement: JCM.00242-14_zjm999093434so1.pdf [file JCM.00242-14_zjm999093434so1.pdf]

## Text S1

**MS-H typing of *Salmonella* flagella.** Reference strains were cultured overnight without motility induction. Colonies from one plate were harvested on a 10  $\mu$ l inoculation loop and transferred to a 1.5 ml centrifuge tubes (Eppendorf) containing 1 ml de-ionized water (dH<sub>2</sub>O) and 2 mg lysozyme (Sigma). The suspension was gently mixed by a pipette tip and left at room temperature for 10 minutes. After this, the mixture was vigorously vortexed for 20 seconds three times, with a break of 2 minutes between vortexing. The mixture was then centrifuged for 20 minutes at 16,000 x g and the supernatant collected using a 1 ml syringe. It was then passed through a 13 mm diameter filter with 0.22  $\mu$ m pore size and low protein binding capability (PALL). The filter was washed with 3 ml of dH<sub>2</sub>O and filled with a solution containing 100 ng/ $\mu$ l sequence grade trypsin (Promega) after the residual water was expelled using a new syringe. The on-filter digestion was performed at 37°C for 2 hours and the digest collected by flushing the filter with 0.6 ml dH<sub>2</sub>O. The tryptic digest from the filter was expelled completely using the syringe, and 25  $\mu$ l of HPLC 2X buffer A (0.2% formic acid, 2% Acetonitrile) was added to 25  $\mu$ l digest. Ten  $\mu$ l of the sample, containing 1/120 of the total tryptic digest, was loaded onto a 0.1 x 3 mm self-packed C18 pre-column for 8 minutes and the pre-column automatically switched to a self-packed C18 nano-LC column. Nano-LC (Proxeon) separation was run at 250 nl/min with a 35 minute acetonitrile gradient from 5-30% followed by a 20 minute flush with 95% acetonitrile. Columns were equilibrated for 10 minutes with buffer A before loading the sample. Mass spectrometry data were collected from LTQ-Orbitrap XL system (ThermoFisher) with a data-dependent acquisition method for peptide ion scanning and fragmentation. For multiple samples runs together in high throughput mode, two blank runs were performed after each sample, the first being called “jigsaw” to wash the nano-column vigorously with several cycles of high concentration acetonitrile, and the second using the same gradient as a true sample run to re-flush and equilibrate the column for the next sample. The mass spectrometry data were searched with Mascot 2.3 (Matrix Science) against a custom *Salmonella* flagella database containing 385 different sequence entries. Search parameters included two missed cleavages of trypsin digestion with no fixed modifications of proteins and possible modifications of methionine oxidation and glutamine and asparagine deamidation.

**MASCOT Search Results**

User : keding  
 E-mail : chengkeding@yahoo.com  
 Search title : flagellin  
 MS data file : C:\Xcalibur\data\20131210-002-0088-01806-OR\Raw\25-20131206-S-1714.raw  
 Database : Flagellin\_Salm 20131007 (384 sequences) 188,399 residues  
 Taxonomy : Bacteria (Eubacteria) (304 sequences)  
 Timestamp : 12 Dec 2013 at 22:13:21 GMT

Not what you expected? Try [the select summary](#).

- ▶ Search parameters
- ▶ Score distribution
- ▶ Legend

**Protein Family Summary**

Significance threshold p<  Max. number of families   
 Ion score or expect cut-off  Dendrograms cut at   
 Preferred taxonomy

**Protein family 1 (out of 1)**

per page

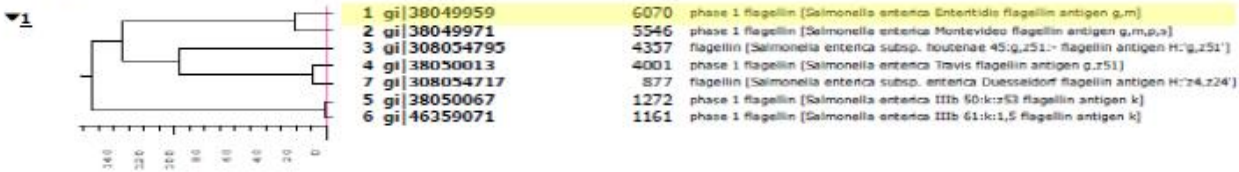

Threshold (0):

|                                                                                          | Score | Mass  | Matches   | Sequences | emPAI |
|------------------------------------------------------------------------------------------|-------|-------|-----------|-----------|-------|
| 1.1 gi 38049959                                                                          | 6070  | 52950 | 109 (103) | 44 (43)   | 32.70 |
| phase 1 flagellin [Salmonella enterica Enteritidis flagellin antigen g,m]                |       |       |           |           |       |
| ▶ 4 samecats of gi 38049959                                                              |       |       |           |           |       |
| 1.2 gi 38049971                                                                          | 5546  | 52974 | 105 (99)  | 42 (41)   | 41.10 |
| phase 1 flagellin [Salmonella enterica Montevideo flagellin antigen g,m,p,s]             |       |       |           |           |       |
| 1.3 gi 38054795                                                                          | 4357  | 52871 | 88 (81)   | 33 (31)   | 16.16 |
| flagellin [Salmonella enterica subsp. houtenae 45:g,z51:- flagellin antigen H:'g,z51']   |       |       |           |           |       |
| ▶ 2 samecats of gi 38054795                                                              |       |       |           |           |       |
| 1.4 gi 38050013                                                                          | 4001  | 52773 | 82 (75)   | 33 (30)   | 14.29 |
| phase 1 flagellin [Salmonella enterica Travis flagellin antigen g,z51]                   |       |       |           |           |       |
| 1.5 gi 38050067                                                                          | 1272  | 51510 | 29 (23)   | 12 (9)    | 1.10  |
| phase 1 flagellin [Salmonella enterica IIIb 50:k:z53 flagellin antigen k]                |       |       |           |           |       |
| 1.6 gi 46359071                                                                          | 1161  | 51431 | 20 (21)   | 13 (9)    | 0.98  |
| phase 1 flagellin [Salmonella enterica IIIb 61:k:1,5 flagellin antigen k]                |       |       |           |           |       |
| 1.7 gi 38054717                                                                          | 877   | 45025 | 17 (13)   | 9 (6)     | 0.76  |
| flagellin [Salmonella enterica subsp. enterica Duesseldorf flagellin antigen H:'s4,z24'] |       |       |           |           |       |
| ▶ 1 samecat of gi 38054717                                                               |       |       |           |           |       |

**151 peptide matches (92 non-duplicate, 59 duplicate)**

| Query Dupon | Observed | Mr (exp) | Mr (calc) | ppm   | M | Score | Expect  | Rank | Peptide                       |
|-------------|----------|----------|-----------|-------|---|-------|---------|------|-------------------------------|
| 74 ▶ 1      | 344.7045 | 721.2944 | 721.2924  | 2.52  | 0 | 41    | 0.00014 | ▶    | K.GLTQARR-N                   |
| 95 ▶ 1      | 377.6940 | 753.3734 | 753.3731  | 0.45  | 0 | 24    | 0.011   | ▶    | K.TMFDK-T                     |
| 100         | 380.7214 | 759.4283 | 759.4137  | 20.6  | 0 | 6     | 0.51    | ▶    | K.ADQRLVK-Y                   |
| 102         | 392.1452 | 762.3159 | 762.3144  | 1.95  | 0 | 25    | 0.0034  | ▶    | K.TGDDGRR-V                   |
| 111 ▶ 1     | 395.6914 | 769.3682 | 769.3680  | 0.22  | 0 | 42    | 0.00019 | ▶    | K.TMFDK-T + Oxidation (M)     |
| 183 ▶ 1     | 416.7244 | 831.4343 | 831.4338  | 0.62  | 0 | 48    | 3.9e-05 | ▶    | K.BATVGDLE-S                  |
| 242         | 466.2750 | 930.5370 | 930.5306  | -1.73 | 1 | 22    | 0.0063  | ▶    | K.LQLLQDR-G                   |
| 354 ▶ 1     | 473.2475 | 944.4804 | 944.5035  | -24.9 | 0 | 52    | 1.8e-06 | ▶    | K.DQLGQIKR-F                  |
| 355         | 475.7502 | 949.4859 | 949.4869  | -1.04 | 0 | 2     | 0.62    | ▶    | K.IYVGAARR-L + Deamidated (N) |

**Fig. S1** Snapshot of MS-H identification of monophasic *Salmonella* Enteritidis [9,12:g,m:-] flagella. Original MS data of flagella trypsin digest was searched against all 385 known *Salmonella* flagellin sequences. The dendrogram was produced using the sequence data of all hits (only the top seven hits are shown), its units representing “peptide ions score” which is correlated with the confidence of the identified peptides. The vertical red line on the dendrogram shows the peptide ion score cut-off value for grouping identified proteins, which was set to “0” here. Individual rows display the results of each protein search summary by way of accession number, protein score, protein molecular weight (mass), number of matches (redundant) and number of distinct sequences (non-redundant). The numbers outside parentheses in both the “Matches” and “Sequences” columns represent the total count of identified peptides, while the numbers in parentheses denote the number of matches above the significance threshold. “emPAI” denotes the relative quantitation [i.e. ten to the power of (the number of observed peptides divided by the number of observable peptides), minus 1]. The top hit (1.1), showing the highest score and emPAI value, is regarded as the correct flagella type (g,m).

**MASCOT Search Results**

User : Keding  
 E-mail : chengkeding@gmail.com  
 Search title : 20120628-gehua  
 MS data file : C:\mass\_data\Raw data\20131022-001-0088-01753-OR\04-20131018-S-0444.RAW  
 Database : Flagellin\_Salm 20131007 (384 sequences; 188,399 residues)  
 Taxonomy : Bacteria (Eubacteria) (384 sequences)  
 Timestamp : 25 Oct 2013 at 13:59:45 GMT

Not what you expected? Try [the select summary](#).

- ▶ Search parameters
- ▶ Score distribution
- ▶ Legend

**Protein Family Summary**

Significance threshold p < 0.05    Max. number of families AUTO  
 Ions score or expect cut-off 0    Dendrograms cut at 0  
 Preferred taxonomy All entries

**Protein family 1 (out of 1)**

10 per page 1

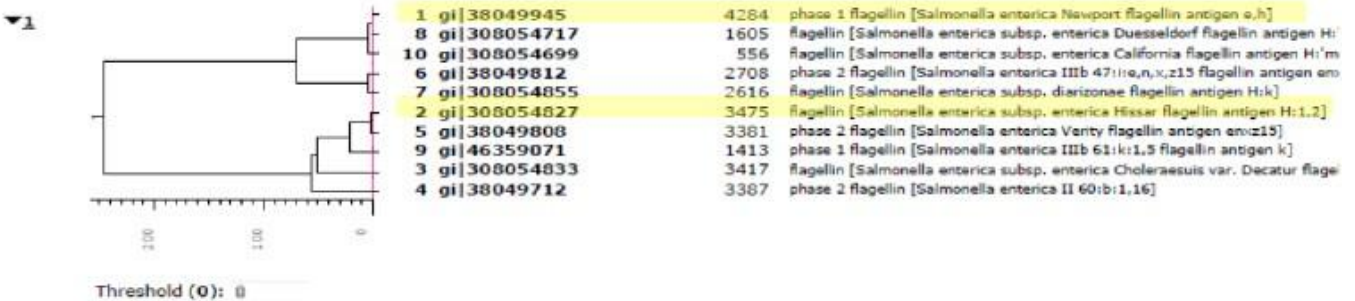

| Rank | Accession    | Score | Mass  | Matches | Sequences | emPAI |
|------|--------------|-------|-------|---------|-----------|-------|
| 1.1  | gi 38049945  | 4284  | 52223 | 83 (75) | 32 (28)   | 13.80 |
| 1.2  | gi 308054827 | 3475  | 52504 | 72 (65) | 29 (25)   | 10.41 |
| 1.3  | gi 308054833 | 3417  | 52468 | 71 (64) | 27 (23)   | 9.73  |
| 1.4  | gi 38049712  | 3387  | 52646 | 70 (63) | 27 (23)   | 9.05  |
| 1.5  | gi 38049808  | 3381  | 52135 | 71 (63) | 26 (23)   | 9.25  |
| 1.6  | gi 38049812  | 2708  | 52135 | 57 (52) | 20 (18)   | 5.28  |

**Fig. S2** Snapshot of MS-H identification of diphasic *Salmonella* Newport [6,8:e,h:1,2] flagella. Original MS data of flagella trypsin digest was searched against all 385 known *Salmonella* flagellin sequences. The dendrogram was produced using the sequence data of all hits (only the top 6 hits are shown), its units representing “peptide ions score” which is correlated with the confidence of the identified peptides. The vertical red line on the dendrogram shows the peptide ion score cut-off value for grouping identified proteins, which was set to “0” here. Two distinct groupings, signifying phase 1 and phase 2 antigens, can easily be seen. Individual rows display the results of each protein search summary by way of accession number, protein score, protein molecular weight (mass), number of matches (redundant) and number of distinct sequences (non-redundant). The numbers outside parentheses in both the “Matches” and “Sequences” columns represent the total count of identified peptides, while the numbers in parentheses denote the number of matches above the significance threshold. “emPAI” denotes the relative quantitation [i.e. ten to the power of (the number of observed peptides divided by the number of observable peptides), minus 1]. The top hits (1.1 and 1.2), showing the highest scores and emPAI values, are regarded as the correct flagella types (e,h and 1,2 representing phase 1 and phase 2 antigens, respectively).

**TABLE S1** Results of MS-H analyses using different loading amounts of flagellin digest produced from *Salmonella enterica* serovar Newport (6,8:e,h:1,2)

| <b>Loading amount<sup>a</sup></b> | <b>Phase 1 H antigen top hit</b> | <b>Phase 2 H antigen top hit</b> |
|-----------------------------------|----------------------------------|----------------------------------|
| 1/5000                            | e,h                              | 1,7                              |
| 1/500                             | e,h                              | 1,5                              |
| 1/50                              | e,h                              | 1,2 <sup>b</sup>                 |

<sup>a</sup>Loading amount represents the fraction of the 600 µl flagellin digest used for MS-H.

<sup>b</sup>1,2 denotes the correct H type for the strain under study.

**TABLE S2** Results of MS-H analyses using different loading amounts of flagellin digest produced from *Salmonella enterica* Infantis (6,7:r:1,5)

| <b>Loading amount<sup>a</sup></b> | <b>Phase 1 H antigen top hit</b> | <b>Phase 2 H antigen top hit</b> |
|-----------------------------------|----------------------------------|----------------------------------|
| 1/5000                            | b                                | 1,5                              |
| 1/500                             | r,i                              | 1,5                              |
| 1/50                              | r <sup>b</sup>                   | 1,5                              |

<sup>a</sup>Loading amount represents the fraction of the 600 µl flagellin digest used for MS-H.

<sup>b</sup>“r” denotes the correct H type for the strain under study.
